# Supplementary material for: Quality Indicators for Colonoscopy and the Risk of Interval Cancer
Source: Atypon-hosted journal article supplement (doi:10.1056/nejmoa0907667), 2010-05-12
Supplement: nejm_kaminski_1795sa1.pdf [file nejm_kaminski_1795sa1.pdf]

## Supplementary Appendix

This appendix has been provided by the authors to give readers additional information about their work.

Supplement to: Kaminski MF, Regula J, Kraszewska E, et al. Quality indicators for colonoscopy and the risk of interval cancer. *N Engl J Med* 2010;362:1795-803.

Supplementary Table 1. Characteristics of interval colorectal cancers and affected individuals.

| <b>Case No*</b> | <b>Sex</b> | <b>Age - yr†</b> | <b>Family history of CRC</b> | <b>Screening colonoscopy findingsP‡</b>    | <b>Extent of examination</b> | <b>Interval CRC localization</b> | <b>Interval CRC pathology; ICD-O§</b> | <b>Time from screening endoscopy - yr</b> | <b>Scheduled time of surveillance - yr</b> |
|-----------------|------------|------------------|------------------------------|--------------------------------------------|------------------------------|----------------------------------|---------------------------------------|-------------------------------------------|--------------------------------------------|
| 1               | M          | 55               | None                         | Normal                                     | Complete                     | Sigmoid colon                    | 82113                                 | 0.5                                       | 10                                         |
| 2               | F          | 57               | None                         | Normal                                     | Complete                     | Cecum                            | 81403                                 | 0.6                                       | 10                                         |
| 3               | M          | 62               | None                         | ATV, HGD, < 10mm, Rectum, Complete removal | Complete                     | Colon, not specified             | 82113                                 | 0.6                                       | 3                                          |
| 4               | F          | 57               | None                         | Diverticuli, Sigmoid colon                 | Complete                     | Cecum                            | 82303                                 | 0.8                                       | 10                                         |
| 5               | F          | 59               | None                         | HP, Sigmoid colon                          | Complete                     | Sigmoid colon                    | 81403                                 | 0.9                                       | 10                                         |
| 6               | F          | 63               | None                         | Normal                                     | Complete                     | Rectum                           | 81403                                 | 1.0                                       | 10                                         |
| 7               | F          | 61               | None                         | Normal                                     | Complete                     | Sigmoid colon                    | 82113                                 | 1.0                                       | 10                                         |
| 8               | F          | 56               | None                         | Normal                                     | Complete                     | Recto-sigmoid junction           | 81403                                 | 1.2                                       | 10                                         |
| 9               | M          | 51               | None                         | ATV, LGD, <10mm, Descending colon;         | Complete                     | Rectum                           | 81403                                 | 1.2                                       | 3                                          |

|    |   |    |      |                                                                                                                  |                                |                         |       |     |                |
|----|---|----|------|------------------------------------------------------------------------------------------------------------------|--------------------------------|-------------------------|-------|-----|----------------|
|    |   |    |      | Two AT, LGD,<br><10mm , Sigmoid<br>colon; ATV, LGD,<br>≥10mm, Rectum,<br>Completeness of<br>removal not assessed |                                |                         |       |     |                |
| 10 | M | 62 | None | Normal                                                                                                           | Complete                       | Descending colon        | 81403 | 1.5 | 10             |
| 11 | M | 59 | None | Normal                                                                                                           | Complete                       | Rectum                  | 81403 | 1.5 | 10             |
| 12 | F | 52 | None | Normal                                                                                                           | Complete                       | Sigmoid colon           | 81403 | 1.5 | 10             |
| 13 | F | 53 | None | Normal                                                                                                           | Complete                       | Sigmoid colon           | 82113 | 1.6 | 10             |
| 14 | M | 63 | None | Normal                                                                                                           | Incomplete;<br>Transverse      | Rectum                  | 81403 | 1.8 | 5 <sup>¶</sup> |
| 15 | F | 53 | None | Normal                                                                                                           | Incomplete;<br>Ascending       | Rectum                  | 82113 | 1.9 | 5              |
| 16 | F | 52 | None | Normal                                                                                                           | Complete                       | Hepatic flexure         | 81403 | 1.9 | 10             |
| 17 | F | 51 | None | Normal                                                                                                           | Complete                       | Colon, not<br>specified | 81403 | 2.1 | 10             |
| 18 | F | 65 | None | Diverticuli,<br>Sigmoid colon                                                                                    | Incomplete;<br>Splenic flexure | Rectum                  | 81403 | 2.1 | 5              |
| 19 | F | 65 | None | Polyp, <5mm, not<br>retrieved,                                                                                   | Complete                       | Rectum                  | 81403 | 2.2 | 10             |

|    |   |    |                                    |                                                                      |          |                         |       |     |    |
|----|---|----|------------------------------------|----------------------------------------------------------------------|----------|-------------------------|-------|-----|----|
|    |   |    |                                    | Ascending colon                                                      |          |                         |       |     |    |
| 20 | F | 61 | None                               | Normal                                                               | Complete | Sigmoid colon           | 81403 | 2.2 | 10 |
| 21 | M | 65 | None                               | Normal                                                               | Complete | Rectum                  | 81403 | 2.4 | 10 |
| 22 | F | 61 | None                               | HP, Sigmoid colon                                                    | Complete | Sigmoid colon           | 81403 | 2.5 | 10 |
| 23 | F | 62 | None                               | Diverticuli,<br>Descending colon                                     | Complete | Rectum                  | 84803 | 2.5 | 10 |
| 24 | F | 52 | None                               | Normal                                                               | Complete | Cecum                   | 84803 | 2.6 | 10 |
| 25 | M | 58 | First degree<br>relative >60<br>yr | Two AT, LGD<br><5mm, Ascending<br>colon, Rectum,<br>Complete removal | Complete | Hepatic flexure         | 81403 | 2.7 | 5  |
| 26 | M | 53 | None                               | Diverticuli<br>Sigmoid colon                                         | Complete | Not specified           | 81403 | 2.7 | 10 |
| 27 | M | 51 | None                               | Two polyps, < 5mm,<br>not retrieved, Rectum                          | Complete | Hepatic flexure         | 82113 | 2.7 | 10 |
| 28 | F | 63 | First degree<br>relative >60<br>yr | Normal                                                               | Complete | Colon, not<br>specified | 82113 | 2.8 | 5  |
| 29 | M | 50 | First degree<br>relative <60<br>yr | Diverticuli<br>Sigmoid colon                                         | Complete | Ascending colon         | 81403 | 2.9 | 5  |

|    |   |    |                              |                                     |                                 |                 |       |     |    |
|----|---|----|------------------------------|-------------------------------------|---------------------------------|-----------------|-------|-----|----|
| 30 | F | 64 | None                         | Diverticuli, Sigmoid colon          | Complete                        | Hepatic flexure | 81403 | 3.1 | 10 |
| 31 | M | 53 | None                         | Diverticuli, Sigmoid colon          | Complete                        | Rectum          | 82113 | 3.2 | 10 |
| 32 | F | 60 | First degree relative <60 yr | Normal                              | Incomplete, Descending/ Sigmoid | Rectum          | 81403 | 3.3 | 5  |
| 33 | F | 64 | None                         | Non specific colitis, Sigmoid colon | Complete                        | Sigmoid colon   | 84803 | 3.4 | 10 |
| 34 | F | 65 | None                         | Normal                              | Complete                        | Cecum           | 81403 | 4.1 | 10 |
| 35 | M | 53 | None                         | Normal                              | Complete                        | Sigmoid colon   | 82113 | 4.4 | 10 |
| 36 | M | 62 | None                         | Normal                              | Incomplete; Transverse          | Rectum          | 81403 | 4.4 | 5  |
| 37 | M | 46 | None                         | Normal                              | Complete                        | Ascending colon | 81403 | 4.4 | 10 |
| 38 | M | 62 | First degree relative >60 yr | Diverticuli, Descending colon       | Complete                        | Rectum          | 81403 | 4.4 | 5  |
| 39 | F | 55 | First degree relative <60 yr | Normal                              | Complete                        | Rectum          | 81403 | 4.4 | 5  |
| 40 | F | 55 | None                         | Normal                              | Complete                        | Rectum          | 82113 | 4.5 | 10 |

|    |   |    |                                    |                                 |          |                 |       |     |    |
|----|---|----|------------------------------------|---------------------------------|----------|-----------------|-------|-----|----|
| 41 | F | 59 | First degree<br>relative >60<br>yr | HP, Sigmoid colon<br>and rectum | Complete | Not specified   | 84803 | 4.7 | 5  |
| 42 | M | 66 | None                               | Normal                          | Complete | Ascending colon | 81403 | 4.7 | 10 |

\*Cases are listed in the order of increasing time from screening colonoscopy.

†Age at screening examination.

‡ Following abbreviations were used for the endoscopy findings: AT – tubular adenoma, ATV – tubulovillous adenoma, HP – hyperplastic polyp, LGD – low grade dysplasia, HGD – high grade dysplasia.

§82113 – tubular adenocarcinoma; 81403 – adenocarcinoma, not otherwise specified; 84803 – mucinous adenocarcinoma; 82303 – solid carcinoma, not otherwise specified<sup>17</sup>

¶ With normal endoscopy findings screening at 5 years was indicated when examination was limited to the left colon.

□ Patient with no family history of colorectal cancer (CRC), but screened below the age of 50 years.

Supplementary Table 2. Risk factors for interval colorectal cancer occurrence in the secondary analysis population\*

| <b>Covariates in the model for interval cancer occurrence</b> | <b>Number of participants</b> | <b>Number of interval cancers</b> | <b>P value (LR test)†</b> | <b>Hazard Ratio [95% CI]</b> | <b>P value</b> |
|---------------------------------------------------------------|-------------------------------|-----------------------------------|---------------------------|------------------------------|----------------|
| Screenee's age – yr                                           |                               |                                   | <0.001                    |                              |                |
| 40 – 49                                                       | 6,981                         | 1                                 |                           | 1                            |                |
| 50 – 54                                                       | 15,649                        | 13                                |                           | 6.91 [0.87, 55.22]           | 0.07           |
| 55 – 59                                                       | 13,777                        | 11                                |                           | 6.84 [0.84, 55.59]           | 0.07           |
| 60 – 66                                                       | 12,551                        | 23                                |                           | 15.72 [2.02, 122.63]         | 0.009          |
| Screenee's family history of CRC                              |                               |                                   | 0.78                      |                              |                |
| No family history                                             | 38,698                        | 40                                |                           |                              |                |
| Two first-degree relatives with CRC                           | 444                           | 1                                 |                           |                              |                |
| One first-degree relative <60 yr of age with CRC              | 2,615                         | 2                                 |                           |                              |                |

|                                                        |        |    |       |  |  |
|--------------------------------------------------------|--------|----|-------|--|--|
| One first-degree relative $\geq 60$ yr of age with CRC | 7,201  | 5  |       |  |  |
| Sex of screene                                         |        |    | 0.55  |  |  |
| Female                                                 | 31,490 | 29 |       |  |  |
| Male                                                   | 17,468 | 19 |       |  |  |
| Endoscopist's adjusted cecal intubation rate           |        |    | 0.45  |  |  |
| <85%                                                   | 7,358  | 9  |       |  |  |
| 85% – 89.9%                                            | 7,210  | 11 |       |  |  |
| 90% – 92.9%                                            | 7,824  | 8  |       |  |  |
| 93% – 94.9%                                            | 4,313  | 2  |       |  |  |
| 95% – 100%                                             | 22,253 | 18 |       |  |  |
| Endoscopist's adenoma detection rate                   |        |    | 0.06‡ |  |  |

|                         |        |    |      |                    |      |
|-------------------------|--------|----|------|--------------------|------|
| ≥20%                    | 10,716 | 4  |      | 1                  |      |
| 15% – 19.9%             | 7,080  | 7  |      | 3.81 [1.08, 13.45] | 0.04 |
| 11% – 14.9%             | 13,920 | 14 |      | 3.86 [1.20, 12.39] | 0.02 |
| <11%                    | 17,242 | 23 |      | 3.43 [1.05, 11.24] | 0.04 |
| Age of endoscopist – yr |        |    | 0.05 |                    |      |
| ≤39                     | 18,958 | 13 |      | 1                  |      |
| 40 – 49                 | 24,989 | 24 |      | 1.65 [0.80, 3.40]  | 0.17 |
| ≥50                     | 5,011  | 11 |      | 3.26 [1.29, 8.24]  | 0.01 |
| Sex of endoscopist      |        |    | 0.08 |                    |      |
| Female                  | 8,454  | 12 |      |                    |      |
| Male                    | 40,504 | 36 |      |                    |      |

|                                   |        |    |      |  |  |
|-----------------------------------|--------|----|------|--|--|
| Specialization of endoscopists    |        |    | 0.72 |  |  |
| Gastroenterology                  | 18,632 | 17 |      |  |  |
| Internal medicine or no specialty | 14,220 | 14 |      |  |  |
| Surgery (any kind)                | 16,106 | 17 |      |  |  |

\* The secondary analysis did not exclude participants with inadequate bowel preparation. Moreover, ‘interval cancer’ was re-defined to include cancers occurring in bowel segments that were not evaluated during the screening colonoscopy. The secondary analysis population consisted of 48,958 participants followed in cancer registers for a median of 52.3 months (interquartile range, 41.4 to 60.0 months) for the occurrence of interval cancer. Over the follow-up period of 205,745 person years, a total of 48 interval colorectal cancers were identified. Of the six additional interval cancers as compared to primary population analysis, two occurred in participants with inadequately prepared colons and four in participants with incomplete examinations.

† The likelihood ratio test for models with and without the specified covariate

‡ Although significant at a border level, we decided to present the hazard ratio, because the factor was significant in the primary analysis
